# Supplementary material for: Prediction of the mechanism of miRNAs in laryngeal squamous cell carcinoma based on the miRNA-mRNA regulatory network
Source: PeerJ. 2021 Aug 24;9:e12075. doi: 10.7717/peerj.12075 (PMC8395572; doi:10.7717/peerj.12075)
Supplement: Supplemental Information 2 [file peerj-09-12075-s002.xlsx]

## Sheet: Sheet1
FD-LSC-1	serial number (mg/mL)	CCK8(blank group)	blank control group	miR-NC	has-miR-140
	the OD value of hole①	0.068	1.312	1.318	1.153
	the OD value of hole②	0.046	1.204	1.243	1.056
	the OD value of hole③	0.048	1.277	1.145	1.042
	the OD value of hole④	0.062	1.312	1.359	1.086
	the OD value of hole⑤	0.062	1.203	1.225	1.115
	the OD value of hole⑥	0.051	1.124	1.095	0.986
	relative growth rate(RGR)
	the OD value of hole①		1	1.00482	0.872186
	the OD value of hole②		1	1.03368	0.872193
	the OD value of hole③		1	0.892596	0.808788
	the OD value of hole④		1	1.0376	0.8192
	the OD value of hole⑤		1	1.01928	0.922875
	the OD value of hole⑥		1	0.972973	0.871389
Cell proliferation rate=((miR-NC) or (has-miR-140)-CCK8(blank group))/(blank control group-CCK8(blank group))
