# Supplementary material for: Prediction of the mechanism of miRNAs in laryngeal squamous cell carcinoma based on the miRNA-mRNA regulatory network
Source: PeerJ. 2021 Aug 24;9:e12075. doi: 10.7717/peerj.12075 (PMC8395572; doi:10.7717/peerj.12075)
Supplement: Supplemental Information 3 [file peerj-09-12075-s003.xlsx]

## Sheet: Sheet1
Number	Gene name	Normal %	The early apoptosis %	Intermediate and late apoptosis %	Death %	Apoptosis ratio(The early apoptosis+Intermediate and late apoptosis) %
1	LSC-1-miR-NC	88.37	0.45	3.38	7.8	3.83
	LSC-1-miR-140-3p	74.24	0.65	7.22	17.9	7.87
2	LSC-1-miR-NC	87.86	1.07	3.06	8.01	4.13
	LSC-1-miR-140-3p	76.02	1.88	6.69	15.41	8.57
3	LSC-1-miR-NC	89.91	1.34	4.89	3.86	6.23
	LSC-1-miR-140-3p	81.93	3.42	5.97	8.68	9.39
