# Supplementary material for: Prediction of the mechanism of miRNAs in laryngeal squamous cell carcinoma based on the miRNA-mRNA regulatory network
Source: PeerJ. 2021 Aug 24;9:e12075. doi: 10.7717/peerj.12075 (PMC8395572; doi:10.7717/peerj.12075)
Supplement: Supplemental Information 4 [file peerj-09-12075-s004.xlsx]

## Sheet: Sheet1
		gene name			average value			△CT=CT(target gene)-CT(reference genes)		△△CT=△CT(experimental group)-△CT(control group)		Amplification multiple=2^-△△CT
number	cell name	U6	miR-140-3p		U6	miR-140-3p		miR-140-3p		miR-140-3p		miR-140-3p
1	LSC-1	19.662	17.859					-1.803		0.556		0.680185
	LSC-1	19.736	17.919		19.693	17.875		-1.817		0.578		0.669892
	LSC-1	19.681	17.847					-1.834		0.568		0.674551
2	HLEC	20.024	17.665					-2.359		0		1
	HLEC	19.943	17.548		19.978	17.5927		-2.395		0		1
	HLEC	19.967	17.565					-2.402		0		1
