# Supplementary material for: Prediction of the mechanism of miRNAs in laryngeal squamous cell carcinoma based on the miRNA-mRNA regulatory network
Source: PeerJ. 2021 Aug 24;9:e12075. doi: 10.7717/peerj.12075 (PMC8395572; doi:10.7717/peerj.12075)
Supplement: Supplemental Information 5 [file peerj-09-12075-s005.xlsx]

## Sheet: Sheet1
		gene name			average value			△CT=CT(target gene)-CT(reference genes)		△△CT=△CT(experimental group)-△CT(control group)		Amplification multiple=2^-△△CT
number	cell name	U6	miR-140-3p		U6	miR-140-3p		miR-140-3p		miR-140-3p		miR-140-3p
1	miR-140-3p	19.662	12.742					-6.92		-5.117		34.7033
	miR-140-3p	19.736	12.936		19.693	12.771		-6.8		-4.983		31.6251
	miR-140-3p	19.681	12.635					-7.046		-5.212		37.0654
2	miR-NC	18.021	16.218					-1.803		0		1
	miR-NC	17.974	16.157		17.999	16.182		-1.817		0		1
	miR-NC	18.004	16.17					-1.834		0		1
